# Supplementary material for: SMAD6 transduces endothelial cell flow responses required for blood vessel homeostasis
Source: PubMed Central journal article supplement (PMC8206051; doi:10.1007/s10456-021-09777-7), 2021-03-29
Supplement: 10456_2021_9777_MOESM1_ESM.pdf [file 10456_2021_9777_MOESM1_ESM.pdf]

SUPPLEMENTARY FIGURES AND FIGURE LEGENDS

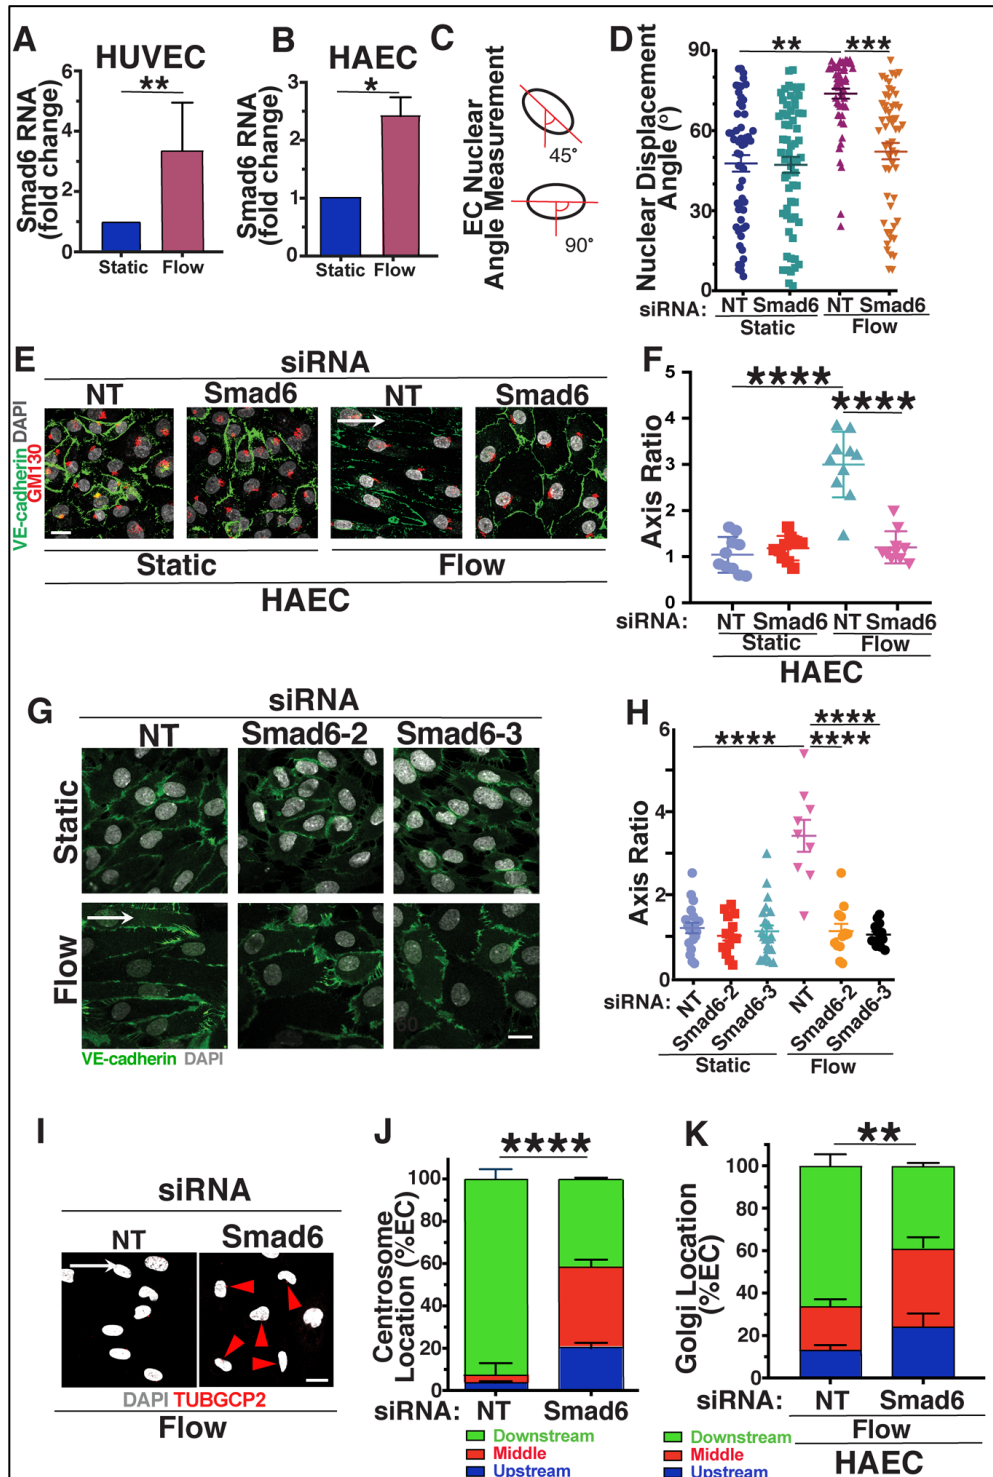

Supplemental Figure 1 (Linked to Fig 1). SMAD6 is Required for Homeostatic Endothelial Cell Flow-Mediated Alignment and Polarization.

**Supplemental Figure 1 (Linked to Fig 1). SMAD6 is Required for Homeostatic Endothelial Cell Flow-Mediated Alignment and Polarization.**

**A,B)** Smad6 qPCR RNA levels (normalized to static control) in HUVEC (A) and HAEC (B). Statistical analysis, Student's t-test; \*,  $p \leq 0.05$ ; \*\*,  $p \leq 0.01$ . **C)** Diagram of nuclear angle measurements used to quantify flow alignment. **D)** Nuclear angle quantification of **Fig1A**. N=3, representative experiment shown. **E)** Representative panels of HAEC stained with VE-cadherin (green, junctions), GM130 (red, Golgi), and DAPI (white, nucleus) under control (static) or flow conditions with indicated treatments. White arrow, flow vector. Scale bar,  $20\mu\text{M}$ . **F)** Quantification of cell axis ratio of HAEC in indicated conditions from **Supp Fig 1E**. Statistical analysis, One-way ANOVA; \*\*\*\*,  $p \leq 0.0001$ . N=3, representative experiment shown. **G)** Representative panels of HUVEC with additional SMAD6 siRNAs (see **Supp. Table 2**) stained with VE-cadherin (green, junctions) and DAPI (white, nucleus) under control (static) or flow conditions. White arrow, flow vector. Scale bar,  $20\mu\text{M}$ . **H)** Quantification of cell axis ratio in indicated conditions from **Supp Fig 1G**. Statistical analysis, One-way ANOVA; \*\*\*\*,  $p \leq 0.0001$ . N=3, representative experiment shown. **I)** Representative panels of HUVEC stained with TUBGCP2 (red, centrosome) and DAPI (white, nucleus) under flow conditions with indicated treatments. White arrow, flow vector. Red arrowhead, centrosome location. Scale bar,  $20\mu\text{M}$ . **J)** Quantification of centrosome location in **Supp Fig 1I** relative to nucleus in indicated conditions.  $n = \geq 30$  cells per condition. Statistical analysis, One-way ANOVA; \*\*\*\*,  $p \leq 0.0001$ . **K)** Quantification of HAEC Golgi localization relative to nucleus (**Supp Fig 1E**) in indicated conditions.  $n = \geq 30$  cells per condition. Statistical analysis, One-way ANOVA; \*\*,  $p \leq 0.01$ .

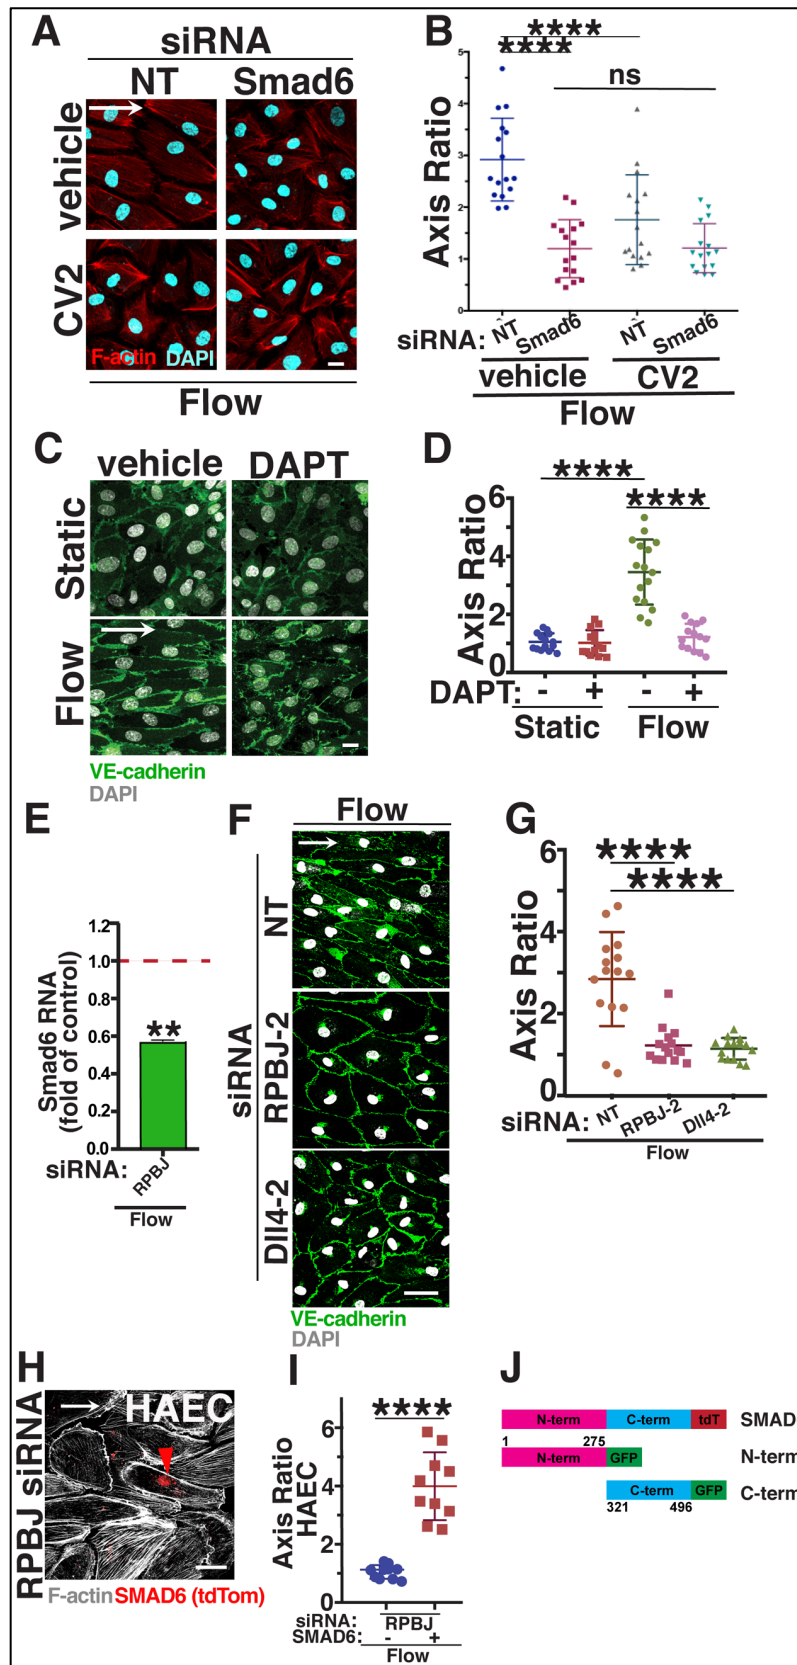

Supplemental Figure 2 (Linked to Fig 1, Fig 2, Fig 3). SMAD6 is Downstream of Notch Signaling in Homeostatic Endothelial Cell Flow-Mediated Alignment.

**Supplemental Figure 2 (Linked to Fig 1, Fig 2, Fig 3). SMAD6 is Downstream of Notch Signaling in Homeostatic Endothelial Cell Flow-Mediated Alignment.**

**A)** Representative panels of HUVEC stained with Phalloidin (red, actin) and DAPI (white, nucleus) under flow conditions with indicated treatments. White arrow, flow vector. Scale bar, 20 $\mu$ M. **B)** Quantification of cell axis ratio in indicated conditions. Statistical analysis, One-way ANOVA; \*\*\*\*,  $p \leq 0.0001$ ; ns, not significant. N=3, representative experiment shown. **C)** Representative panels of HUVEC stained with VE-cadherin (green, junctions) and DAPI (white, nucleus) under control (static) or flow conditions with indicated treatments. White arrow, flow vector. Scale bar, 20 $\mu$ M. **D)** Quantification of cell axis ratio in indicated conditions. Statistical analysis, One-way ANOVA; \*\*\*\*,  $p \leq 0.0001$ . N=3, representative experiment shown. **E)** qPCR RNA levels (normalized to static control) in HUVEC treated with RPBj siRNA. Statistical analysis, Student's t-test; \*\*,  $p \leq 0.01$ . **F)** Representative panels of HUVEC with additional RPBj and DLL4 siRNAs (see **Supp. Table 2**) stained with VE-cadherin (green, junctions) and DAPI (white, nucleus) under control (static) or flow conditions. White arrow, flow vector. Scale bar, 50 $\mu$ M. **G)** Quantification of cell axis ratio in indicated conditions. Statistical analysis, One-way ANOVA; \*\*\*\*,  $p \leq 0.0001$ . N=3, representative experiment shown. **H)** Representative panel of HAEC treated with RPBj siRNA and stained with phalloidin (F-actin, white) and expression construct (SMAD6) under flow conditions. White arrow, flow vector. Red arrowhead, positive EC. Scale bar, 20 $\mu$ M. **I)** Quantification of cell axis ratio in indicated conditions. Statistical analysis, student's t-test; \*\*\*\*,  $p \leq 0.0001$ . N=3, representative experiment shown. **J)** Diagram showing SMAD6 constructs. Numbers indicate amino acids in human SMAD6.



**Supplemental Table 1. Changes in HUVEC Gene Expression (total 33,694).**

| COMPARISON:<br>Endothelial Cell<br>(Condition) | Genes UP<br>Number (%) | Genes DOWN<br>Number (%) | Total Genes<br>DEG No (%) |
|------------------------------------------------|------------------------|--------------------------|---------------------------|
| NT (static) vs.<br>Smad6 KD (static)           | 164 (0.5%)             | 240 (0.7%)               | 404 (1.2%)                |
| NT (static) vs.<br>NT (flow)                   | 1033 (3.1%)            | 1229 (3.6%)              | 2262 (6.7%)               |
| NT (flow) vs.<br>Smad6 KD (flow)               | 1361 (4.0%)            | 958 (2.9%)               | 2319 (6.9%)               |
| Smad6 KD (static)<br>vs. Smad 6 KD<br>(flow)   | 1596 (4.7%)            | 1407 (4.2%)              | 3003 (8.9%)               |
| NT (static) vs.<br>Smad6 KD (flow)             | 1286 (3.8%)            | 1369 (4.1%)              | 2655 (7.9%)               |
| NT (flow) vs.<br>Smad6 KD (static)             | 1850 (5.5%)            | 1903 (5.7%)              | 3753 (11.2%)              |

Supplemental Table 2. Key Resources.

| Reagent                                   | Source         | Catalog        |
|-------------------------------------------|----------------|----------------|
| <b><u>Antibodies:</u></b>                 |                |                |
| Rabbit monoclonal anti-VE-cadherin        | Cell Signaling | D87F2;2077969  |
| Mouse monoclonal anti-PECAM1              | Cell Signaling | 3528S;2160882  |
| Rabbit monoclonal anti-GM130              | Abcam          | EP892Y;52649   |
| Mouse monoclonal anti-TUBGCP2             | Abcam          | GCP2-01;140225 |
| Mouse monoclonal anti- $\gamma$ tubulin   | Thermo Fisher  | T5326;2211251  |
| Sheep polyclonal anti-BRDU                | Abcam          | ab1893;302659  |
| Rabbit polyclonal anti-Ki67               | Abcam          | ab15580;443209 |
| Goat anti-Rabbit 488                      | Life Tech      | A-11034        |
| Goat anti-Mouse 584                       | Life Tech      | A-11005        |
| Donkey anti-Sheep 594                     | Life Tech      | A-11016        |
| <b><u>Critical Commercial Assays:</u></b> |                |                |
| Lipofectamine 2000 Transfection           | Thermo Fisher  | 11668027       |
| Lipofectamine LTX Transfection            | Thermo Fisher  | 15338030       |
| HUVEC Nucleofector Kit                    | Lonza          | VPB-1002       |
| Amaxa Nucleofector Kit Primary Mam        | Lonza          | VPI-1001       |
| iScript Reverse Transcription Kit         | Bio-Rad        | 1708891        |
| iTaq Universal SYBR Green SuperMix        | Bio-Rad        | 1725121        |
| $\mu$ -Slide VI0.4                        | Ibidi          | 80601          |
| xCELLigence RTCA E-Plate 16               | Acea Biosci    | 5469830001     |
| <b><u>qPCRprimers(5'-3'):</u></b>         |                |                |
| fGAPDH:CAGCAAGAGCACAAGAGGA<br>AGAGA       | Eurofins       | N/A            |
| rGAPDH:TTGATGGTACATGACAAGGT<br>GCGG       | Eurofins       | N/A            |
| fSMAD6:CTGGAGTTGTTGAGCAGCC                | Eurofins       | N/A            |
| rSMAD6:GTGCGTCTTTCTTGTTTTGTC<br>C         | Eurofins       | N/A            |
| fKLF4:CCCAATTACCCATCCTTCCT                | Eurofins       | N/A            |
| rKLF4:CTTTGGCTTGGGCTCCTCT                 | Eurofins       | N/A            |
| fNOTCH1:GTCAACGCCGTAGATGACC               | Eurofins       | N/A            |
| rNOTCH1:TTGTTAGCCCCGTTCTTCA<br>G          | Eurofins       | N/A            |
| fRBPJ:GGATAGGAAATAGTGACCAAG<br>AAATG      | Eurofins       | N/A            |
| rRBPJ:AGTGCTTTGCTTGTCTGAG                 | Eurofins       | N/A            |
| fDLL4:TGCAACTGCCCTTATGGCTTTG<br>TG        | Eurofins       | N/A            |

|                                 |            |          |
|---------------------------------|------------|----------|
| rDLL4:ACAAGTTGTTTCATGGCTTCCCTGC | Eurofins   | N/A      |
| fJAG1:TGCCAAGTGCCAGGAAGT        | Eurofins   | N/A      |
| rJAG1:GCCCCATCTGGTATCACACT      | Eurofins   | N/A      |
| fJAG2:TGGGACTGGGACAACGATA       | Eurofins   | N/A      |
| rJAG2:ATGCGACACTCGCTCGAT        | Eurofins   | N/A      |
| fHES1:ACGTGCGAGGGCGTTAATAC      | Eurofins   | N/A      |
| rHES1:GGGGTAGGTCATGGCATTGA      | Eurofins   | N/A      |
| fPCDH12:CAAGCATCCACGTCACATGG    | Eurofins   | N/A      |
| rPCDH12:GTGTGGCATTGGTTAGCAACA   | Eurofins   | N/A      |
| <b><u>Single siRNAs:</u></b>    |            |          |
| SMAD6-1                         | Life Tech  | s8411    |
| SMAD6-2                         | Life Tech  | s8410    |
| NOTCH1-1                        | Life Tech  | 9635     |
| RBPJ-1                          | Life Tech  | s7252    |
| DLL4-1                          | Life Tech  | s29214   |
| JAG1-1                          | Life Tech  | s1175    |
| JAG2-1                          | Life Tech  | s7643    |
| PCDH12-1                        | Life Tech  | s27870   |
| <b><u>siRNA Pools:</u></b>      |            |          |
| SMAD6-3                         | Santa Cruz | sc-38380 |
| NOTCH1-2                        | Santa Cruz | sc-36095 |
| RBPJ-2                          | Santa Cruz | sc-38214 |
| DLL4-2                          | Santa Cruz | sc-39667 |
| JAG1-2                          | Santa Cruz | sc-37202 |
| JAG2-2                          | Santa Cruz | sc-39672 |
| PCDH12-2                        | Santa Cruz | sc-76896 |
